# Supplementary material for: Onset, duration, and persistence of taste and smell changes and other COVID-19 symptoms: longitudinal study in Israeli patients
Source: bioRxiv or medRxiv preprint supplement (doi:10.1101/2020.09.25.20201343), 2020-10-17
Supplement: Supplementary file [file 2020.09.25.20201343-1.pdf]

# Supplementary material

## Onset, duration, and persistence of taste and smell changes and other COVID-19 symptoms: longitudinal study in Israeli patients

Hadar Klein<sup>1#</sup>, Kim Asseo<sup>1#</sup>, Noam Karni<sup>2#</sup>, Yuval Benjamini<sup>3</sup>, Ran Nir-Paz<sup>4</sup>, Mordechai Muszkat<sup>2</sup>, Sarah Israel<sup>2§</sup>, Masha Y. Niv<sup>1§\*</sup>

#equal contributions as first authors

§equal contributions as senior authors

\*corresponding author

<sup>1</sup>The Institute of Biochemistry, Food and Nutrition, The Hebrew University, Rehovot, Israel

<sup>2</sup>Department of Medicine, Hadassah University Hospital, Mt. Scopus Campus, Jerusalem, Israel

<sup>3</sup>Department of Statistics, The Hebrew University, Mt. Scopus Campus, Jerusalem, Israel

<sup>4</sup>Department of Clinical Microbiology and Infectious Diseases, Hadassah-Hebrew University medical center

| 27 symptoms:                   |                                 |                    |
|--------------------------------|---------------------------------|--------------------|
| ≥50%                           | <50%                            |                    |
| <b><u>Taste change</u></b>     | <b><u>Productive cough</u></b>  | Bad taste in mouth |
| <b><u>Smell change</u></b>     | <b><u>Runny nose</u></b>        | Voice change       |
| <b><u>Fever</u></b>            | <b><u>Sore throat</u></b>       | Eyes burn          |
| <b><u>Dry cough</u></b>        | Chemesthesis change             | Dizziness          |
| <b><u>Muscle aches</u></b>     | <b><u>Diarrhea</u></b>          | Vision changes     |
| <b><u>Headache</u></b>         | Chest pain                      | Coated tongue      |
| <b><u>Lack of appetite</u></b> | Abdominal pain                  | Ears pressure      |
|                                | <b><u>Breath difficulty</u></b> | Lacrimation        |
|                                | <b><u>Vomit/nausea</u></b>      | Hearing change     |
|                                | <b><u>Fatigue</u></b>           | Eyes discharge     |

**Figure S1. 27 symptoms of the questionnaire.** Symptoms with prevalence higher than 50% are presented with orange background, and those with prevalence lower than 50% are presents with light blue background. Official CDC symptoms are bolded. Symptoms that were included in the final analysis are underlined.

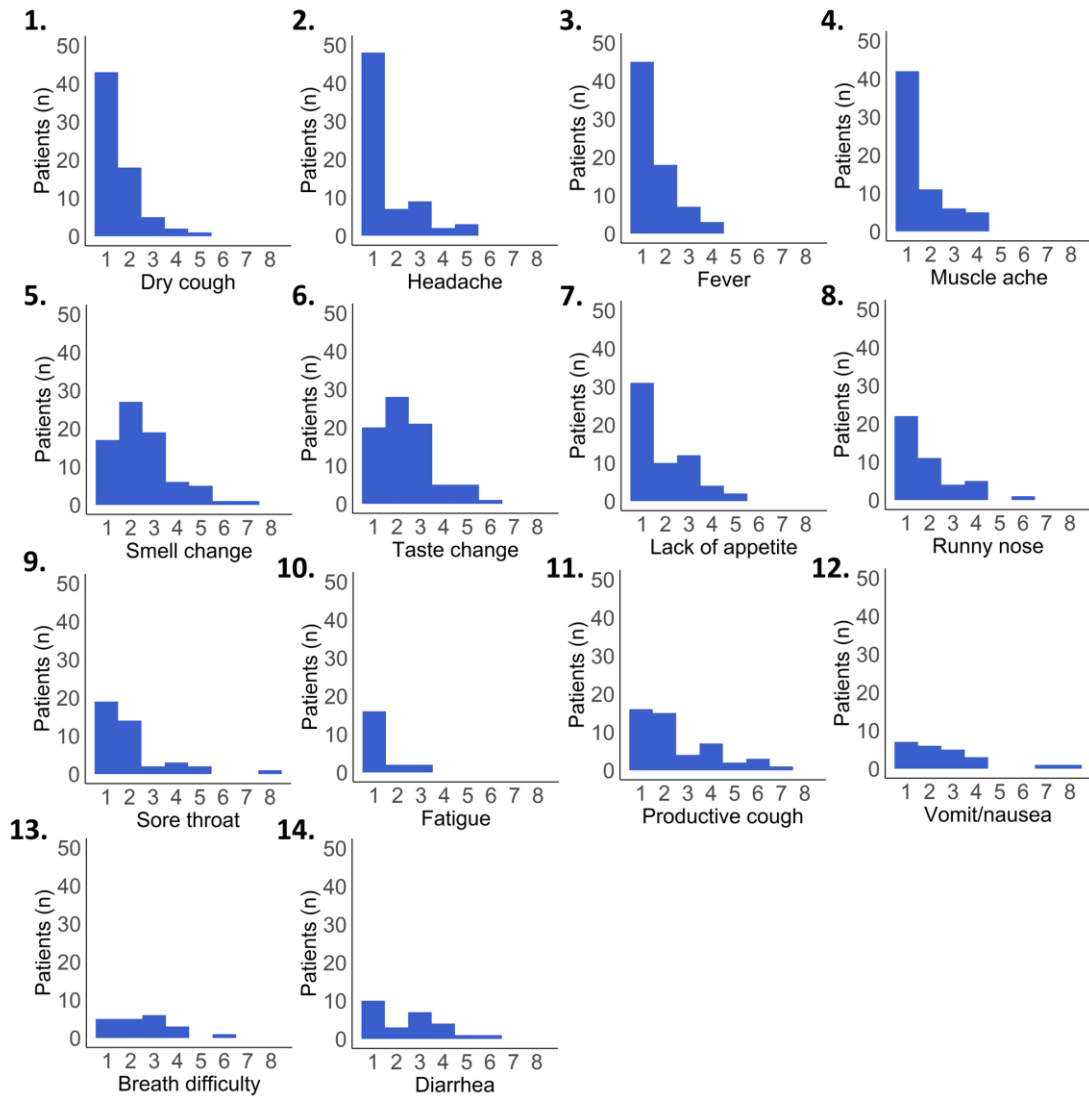

**Figure S2. Distributions of symptoms' order of appearance.** Y axis shows number of patients (n) and X-axis is order of appearance of the specified symptom (first symptom to appear or followed other symptoms).

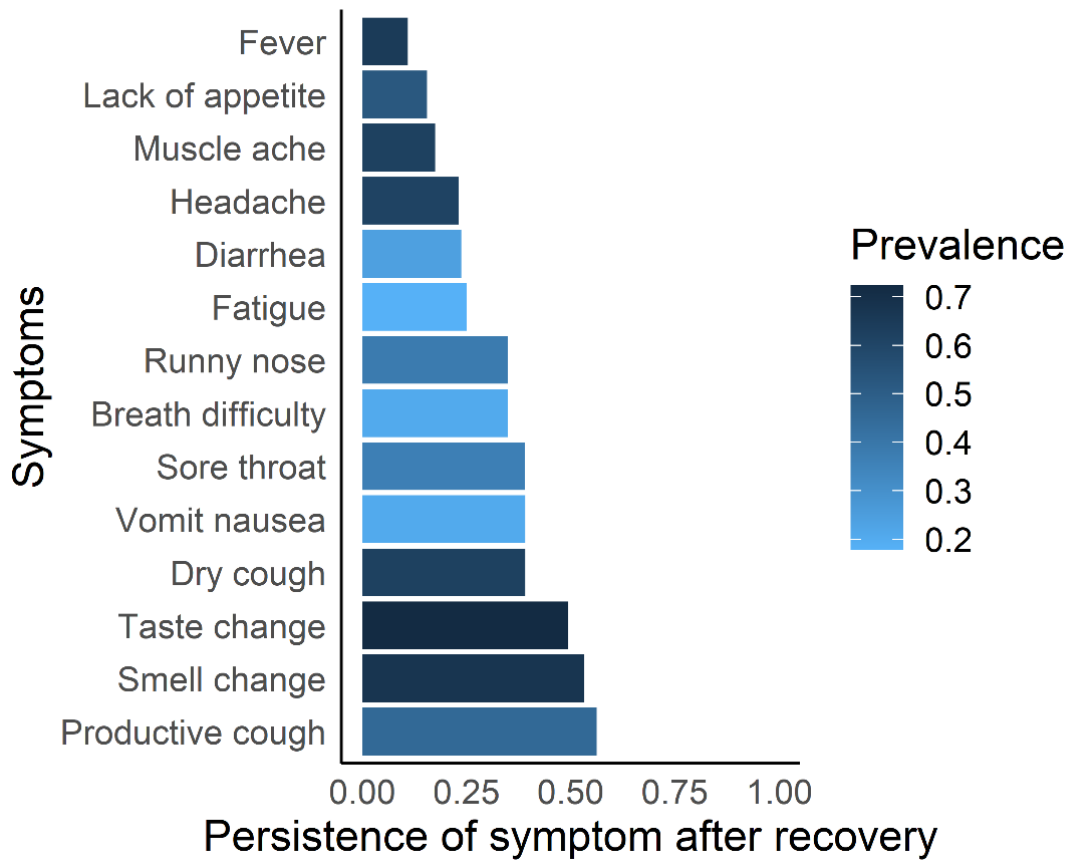

**Figure S3. Persistent symptoms after recovery (13 days post initiation of symptoms).** Y axis list symptoms and X axis shows prevalence of symptoms' persistent post recovery.

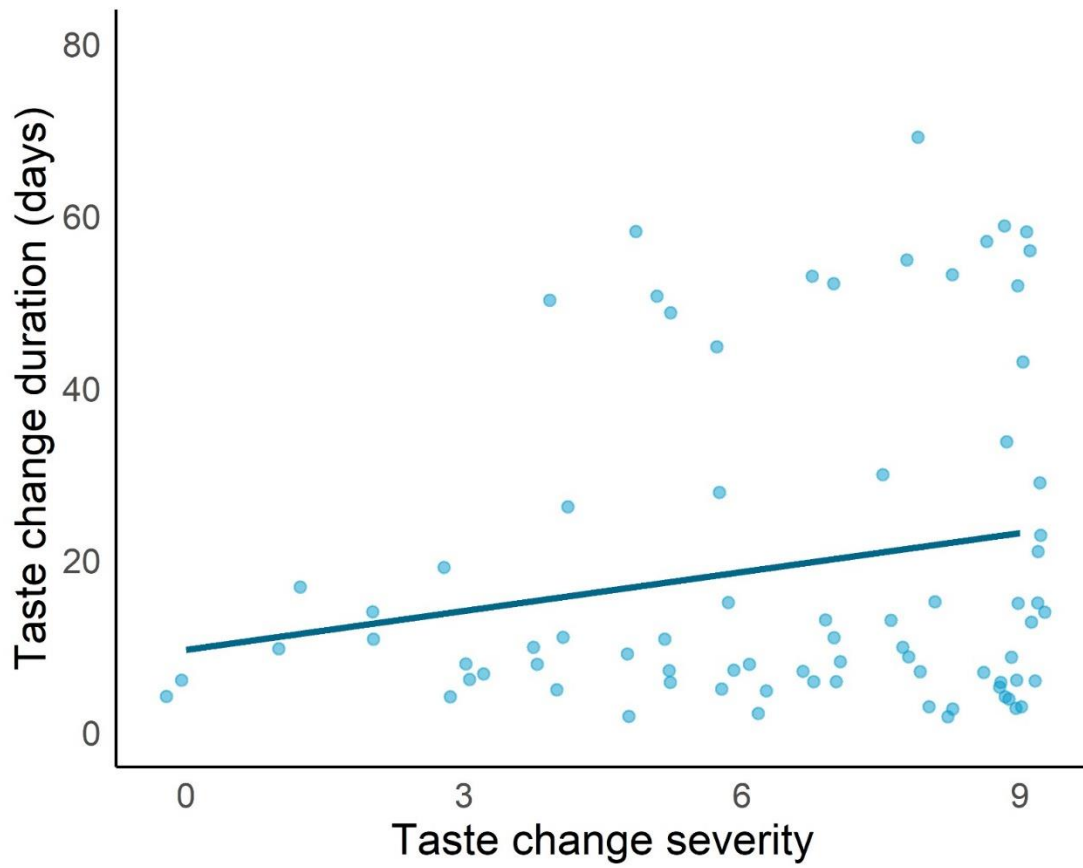

**Figure S4. Correlation between taste change severity and duration (n=76).** Y axis shows taste change duration (days) and X axis shows taste change severity.
