# Supplementary material for: Onset, duration, and persistence of taste and smell changes and other COVID-19 symptoms: longitudinal study in Israeli patients
Source: bioRxiv or medRxiv preprint supplement (doi:10.1101/2020.09.25.20201343), 2020-10-17
Supplement: Supplementary file [file media-1.pdf]

**Supplementary Material:**

**Onset, duration, and persistence of taste and smell changes and other COVID-19  
symptoms: longitudinal study in Israeli patients**

Hadar Klein<sup>1#</sup>, Kim Asseo<sup>1#</sup>, Noam Karni<sup>2#</sup>, Yuval Benjamini<sup>3</sup>, Ran Nir-Paz<sup>4</sup>, Mordechai  
Muszkat<sup>2</sup>, Sarah Israel<sup>2§</sup>, Masha Y. Niv<sup>1§\*</sup>

#equal contributions as first authors

§equal contributions as senior authors

\*corresponding author

<sup>1</sup>The Institute of Biochemistry, Food and Nutrition, The Hebrew University, Rehovot, Israel

<sup>2</sup>Department of Medicine, Hadassah University Hospital, Mt. Scopus Campus, Jerusalem,  
Israel

<sup>3</sup>Department of Statistics and Data Science, The Hebrew University, Mt. Scopus Campus,  
Jerusalem, Israel

<sup>4</sup>Department of Clinical Microbiology and Infectious Diseases, Hadassah-Hebrew University  
medical center

## Supplementary material

| 27 symptoms:            |                                 |                    |
|-------------------------|---------------------------------|--------------------|
| ≥50%                    | <50%                            |                    |
| <u>Taste change</u>     | <b><u>Productive cough</u></b>  | Bad taste in mouth |
| <u>Smell change</u>     | <b><u>Runny nose</u></b>        | Voice change       |
| <u>Fever</u>            | <b><u>Sore throat</u></b>       | Eyes burn          |
| <u>Dry cough</u>        | Chemesthesis change             | Dizziness          |
| <u>Muscle aches</u>     | <b><u>Diarrhea</u></b>          | Vision changes     |
| <u>Headache</u>         | Chest pain                      | Coated tongue      |
| <u>Lack of appetite</u> | Abdominal pain                  | Ears pressure      |
|                         | <b><u>Breath difficulty</u></b> | Lacrimation        |
|                         | <b><u>Vomit/nausea</u></b>      | Hearing change     |
|                         | <b><u>Fatigue</u></b>           | Eyes discharge     |

**Figure S1. 27 symptoms of the questionnaire.** Symptoms with prevalence higher than 50% are presented with orange background, and those with prevalence lower than 50% are presents with light blue background. Official CDC symptoms are bolded. Symptoms that were included in the final analysis are underlined.

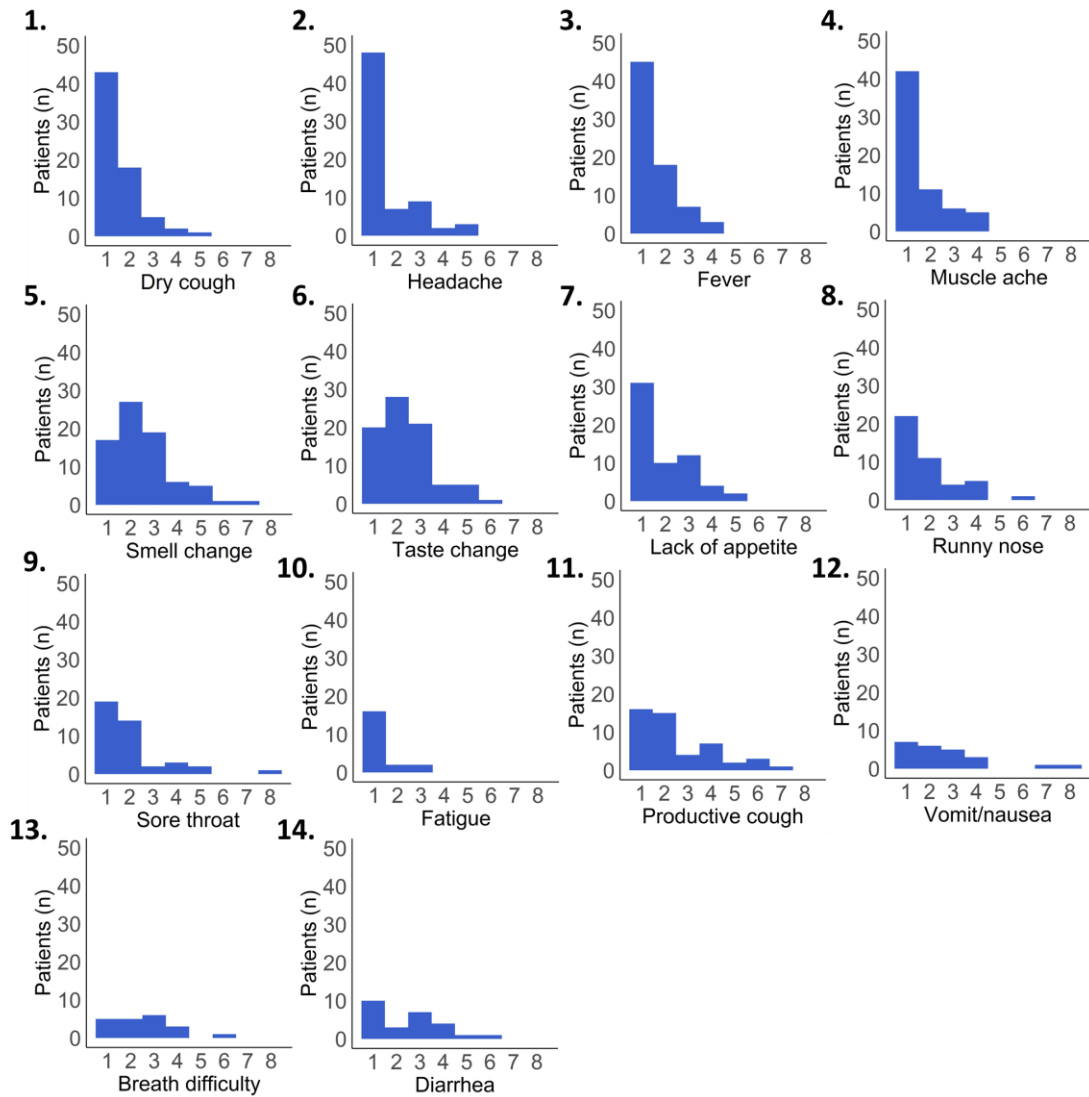

**Figure S2. Distributions of symptoms' order of appearance.** Y axis shows number of patients (n) and X-axis is order of appearance of the specified symptom (first symptom to appear or followed other symptoms).

**Table S1. Unresolved symptoms at 6-months follow-up.** Number of patients experiencing each symptom is listed.

| <b>Symptom</b>                  | <b>Unresolved</b> |
|---------------------------------|-------------------|
| <b>Fatigue</b>                  | <b>23</b>         |
| <b>Smell change</b>             | <b>15</b>         |
| <b>Breath difficulty</b>        | <b>10</b>         |
| <b>Taste change</b>             | <b>8</b>          |
| <b>Memory disorders</b>         | <b>6</b>          |
| <b>Muscle aches</b>             | <b>5</b>          |
| <b>Headache</b>                 | <b>4</b>          |
| <b>Hair loss</b>                | <b>3</b>          |
| <b>Nose blockage</b>            | <b>2</b>          |
| <b>Legs pain</b>                | <b>2</b>          |
| <b>Eye disorders</b>            | <b>2</b>          |
| <b>Low physical performance</b> | <b>2</b>          |
| <b>Vomit</b>                    | <b>1</b>          |
| <b>Throat ache</b>              | <b>1</b>          |
| <b>Chest pain</b>               | <b>1</b>          |
| <b>Dizziness</b>                | <b>1</b>          |
| <b>Knee pain</b>                | <b>1</b>          |
| <b>Mouth sores</b>              | <b>1</b>          |
| <b>Hands pain</b>               | <b>1</b>          |
| <b>Ear pain</b>                 | <b>1</b>          |
| <b>Paresthesia</b>              | <b>1</b>          |
| <b>Palpitations</b>             | <b>1</b>          |
| <b>Anemia</b>                   | <b>1</b>          |
| <b>Anxiety</b>                  | <b>1</b>          |
| <b>Dry cough</b>                | <b>1</b>          |
| <b>Hearing disorder</b>         | <b>1</b>          |
| <b>Rib pain</b>                 | <b>1</b>          |
| <b>Depression</b>               | <b>1</b>          |
| <b>Concentration Disorders</b>  | <b>1</b>          |
| <b>Runny nose</b>               | <b>1</b>          |
| <b>Abdominal pain</b>           | <b>1</b>          |
| <b>Diarrhea</b>                 | <b>1</b>          |

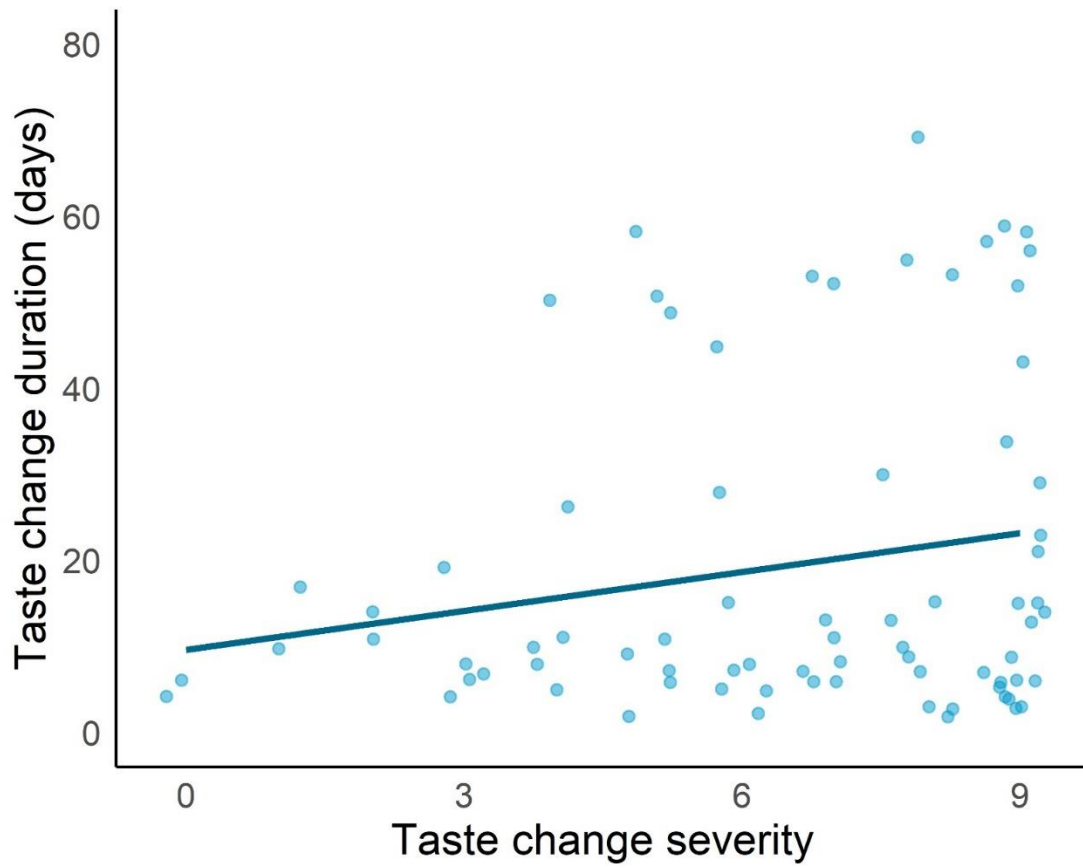

**Figure S3. Correlation between taste change severity and duration (n=76).** Y axis shows taste change duration (days) and X axis shows taste change severity.

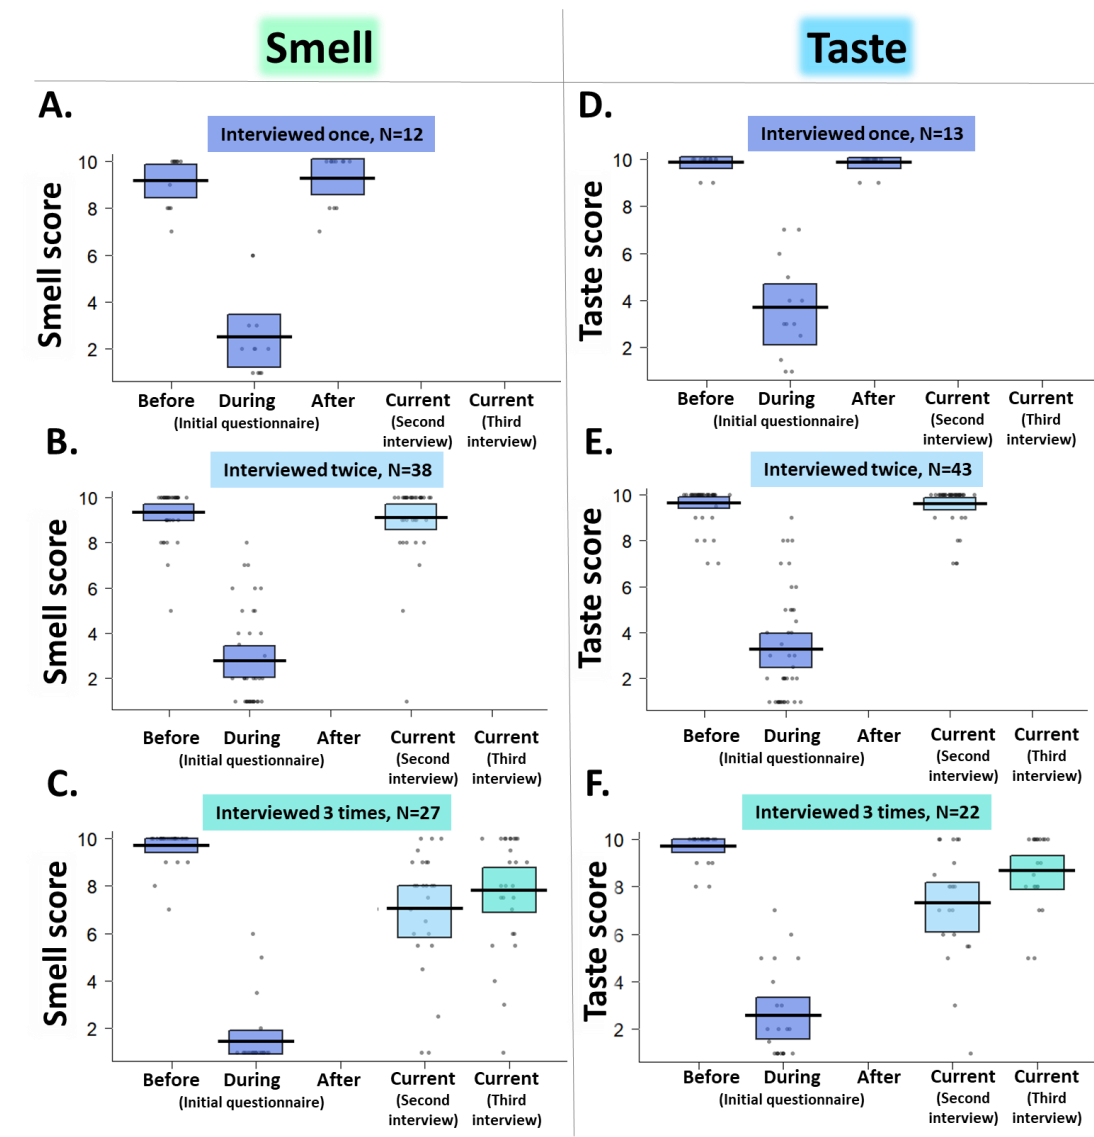

**Figure S4. Smell and taste ratings over 6-weeks follow-ups.** A-C. Smell scores of patients recovered at the initial (A), second (B), and third (C) interviews. D-F. Taste scores of patients recovered at the initial (D), second (E), and third (F) interviews. We plot the mean and the confidence interval for the mean. Y axis shows rating of smell/taste ability and X axis depicts 5 time points ratings: before, during and after their illness, rated at initial questionnaire (blue), and at two following questionnaires (3-weeks (light blue) and 6-weeks (turquoise) follow-ups).
